# Supplementary material
Source: PubMed Central journal article supplement (PMC4089864)
Supplement: NIHMS358071-supplement-1_si_001.pdf [file NIHMS358071-supplement-1_si_001.pdf]

# Supporting Information

## **Bryonolic Acid Transcriptional Control of Anti-inflammatory and Antioxidant Genes in Macrophages in Vitro and in Vivo**

Tonibelle N. Gatabonton-Schwager,<sup>†</sup> John J. Letterio,<sup>†‡</sup> and Gregory P. Tochtrop<sup>†\*</sup>

<sup>\*</sup>Department of Chemistry

<sup>†</sup>Department of Pharmacology

<sup>‡</sup>Department of Pediatrics and Case Comprehensive Cancer Center

Case Western Reserve University, Cleveland, Ohio 44106

**\*Corresponding author.** Tel: 216-368-2351. Fax: 216-368-3006. E-mail: tochtrop@case.edu.

# Contents

Page 3: **Figure S1.** Comparative analyses of induction of HO-1 expression by triterpenoids (**1-6**).

Page 4: **Figure S2.** Immunoblot analysis of cytoplasmic and nuclear Nrf2 in bryonolic acid (BA) (**1**)- and oleanolic acid (OA) (**2**)-treated RAW 264.7 cells.

Page 5: **Figure S3.** Positive and negative control for bryonolic acid (BA) (**1**) treated RAW 264.7 cells.

Page 6: **Figure S4.** Bryonolic acid (BA) (**1**) selectively regulates Nrf2 target genes.

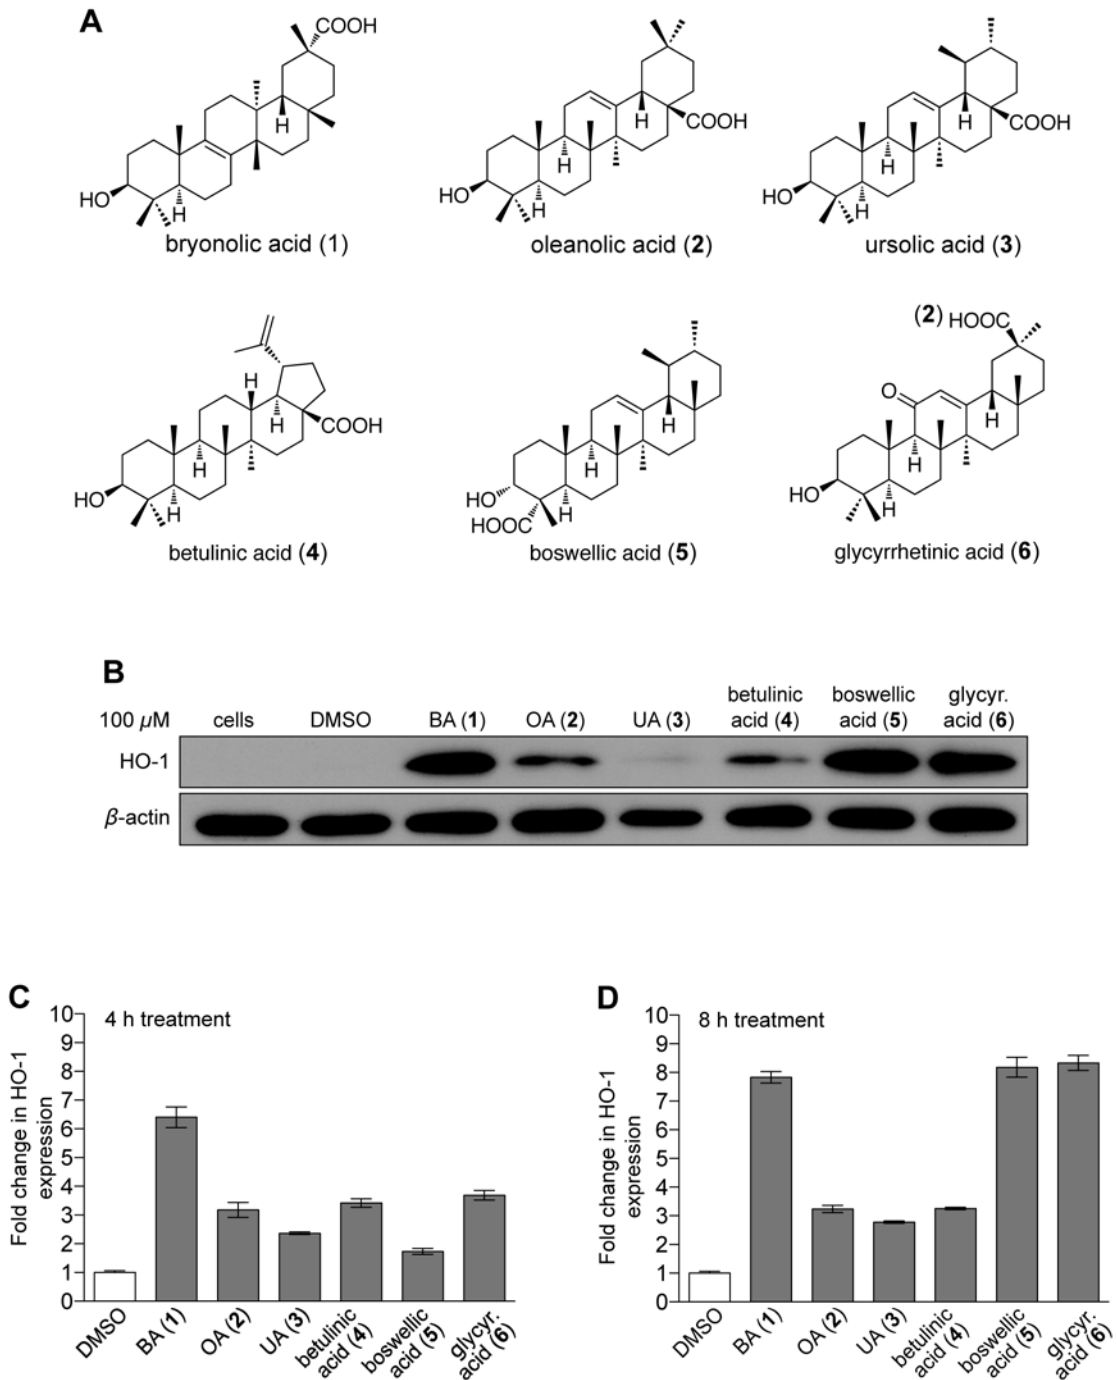

**Figure S1.** Comparative analyses of induction of HO-1 expression by triterpenoids (1-6). (A) Structurally similar triterpenoids were compared with bryonolic acid (BA) (1) for their ability to induce HO-1 expression. RAW 264.7 cells were treated with 100  $\mu$ M BA (1), oleanolic acid (OA) (2), ursolic acid (UA) (3), betulinic acid (4), boswellic acid (5), or glycyrrhetic acid (glycyrr. acid) (6). (B) HO-1 protein levels were quantified through immunoblot analyses in cells treated with triterpenoids (1-6) for 8 h. HO-1 mRNA levels were quantified via qRT-PCR in cells treated for 4 h (C) or 8 h (D).

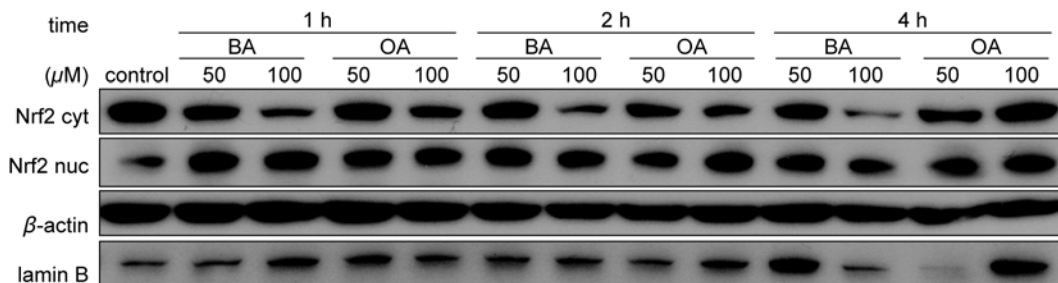

**Figure S2.** Bryonolic acid (BA) (1) induces translocation of Nrf2 into the nucleus. RAW 264.7 cells were treated with 50  $\mu$ M and 100  $\mu$ M BA (1) or oleanolic acid (OA) (2) at 1, 2 and 4 h and probed for nuclear and cytoplasmic Nrf2

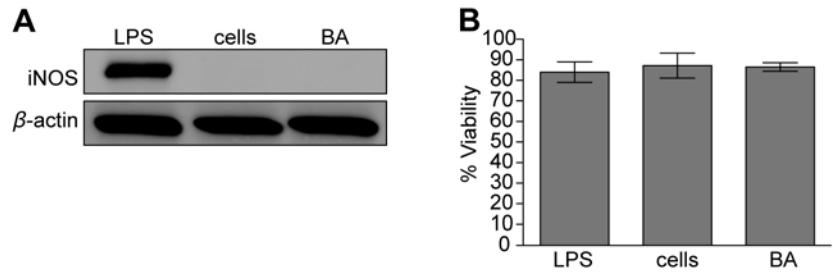

**Figure S3.** Positive and negative control for bryonolic acid (BA) (1)-treated cells. RAW 264.7 cells were treated with 5 ng/mL LPS or 100  $\mu$ M BA for 24 h. Immunoblot analysis of iNOS protein levels with  $\beta$ -actin as loading control (A) and cell viability measurement via tryphan blue exclusion test (B).

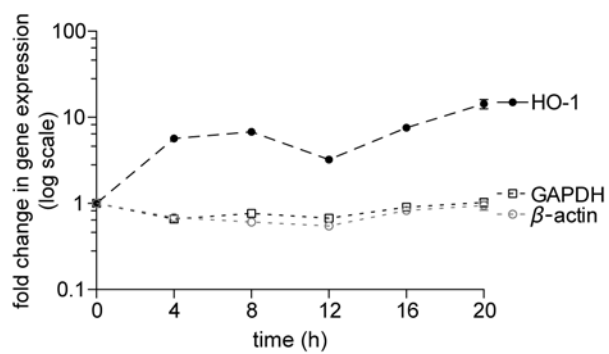

**Figure S4.** BA selectively regulates Nrf2 target genes. RAW 264.7 cells were treated with 100  $\mu$ M bryonolic acid (BA) (**1**) at different time points. qRT-PCR was performed to measure  $\beta$ -actin and GAPDH.
